# Supplementary material
Source: PubMed Central journal article supplement (PMC4413310)
Supplement: pnas.201500953SI.pdf [file pnas.201500953SI.pdf]

# Supporting Information

Zhou et al. 10.1073/pnas.1500953112

## SI Materials and Methods

**Data Analysis.** Single-channel data were analyzed with the threshold-based single-channel search function of Clampfit 9.2 (Molecular Devices). The conductance–potential ( $G$ – $V$ ) relationship of BK currents was constructed from isochronal tail current measured at 100  $\mu$ s after variable test steps. The  $G$ – $V$  curve was fit with the Boltzmann function to determine the potential for half-maximal activation ( $V_h$ ) and apparent equivalent gating charge ( $z$ ):

$$G(V) = \frac{G_{\max}}{1 + \exp\left(\frac{zF(V_h - V)}{RT}\right)},$$

where  $F$ ,  $R$ , and  $T$  have their usual physical meanings. The inhibition dose–response curves in Fig. 3 *D1–D5* were fit with a Hill equation

1. Smart OS, Neduvilil JG, Wang X, Wallace BA, Sansom MS (1996) HOLE: A program for the analysis of the pore dimensions of ion channel structural models. *J Mol Graph* 14(6):354–360, 376.

$$\frac{I_{Cd}}{I_{ctrl}} = \frac{1}{1 + \left(\frac{[Cd^{2+}]}{IC_{50}}\right)^n},$$

where  $n$  is Hill coefficient and  $IC_{50}$  is  $[Cd^{2+}]$  blocking 50% of BK current. Statistical analysis and curve fitting were performed with OriginPro 7.5 (OriginLab Corporation). Mean values are presented as mean  $\pm$  SEM.

**Molecular Modeling.** Radius profiles of Kv1.2 and KcsA channels shown in Fig. 1*B* are calculated from their crystal structures using program HOLE (1). The homology model of the BK PGD shown in Fig. 5 was generated in Modeler (2) by using the Kv1.2 structure (PDB ID code 2A79) as a template. Structural adjustment and energy minimization were performed in UCSF Chimera (3), with default parameters used for energy minimization. In Fig. 5, valines of BK<sub>319</sub> and Kv1.2<sub>406</sub> are replaced by cysteines, and valine of Kv1.2<sub>408</sub> is replaced by glutamate using the swapaa function in UCSF Chimera. The structure images in Fig. 5 were prepared using UCSF Chimera.

2. Sali A, Blundell TL (1993) Comparative protein modelling by satisfaction of spatial restraints. *J Mol Biol* 234(3):779–815.  
3. Pettersen EF, et al. (2004) UCSF Chimera—a visualization system for exploratory research and analysis. *J Comput Chem* 25(13):1605–1612.

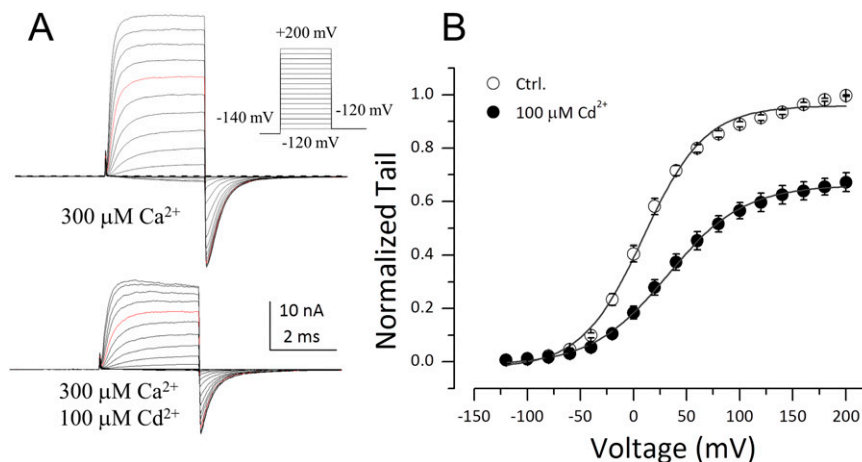

**Fig. S1.** The leftward-gating shift of  $Cd^{2+}$  in the presence of 300  $\mu$ M  $Ca^{2+}$  is partially dependent on the low-affinity divalent cation binding site E399. (A) Macroscopic currents of mSlo1E399A recorded in the absence (Upper) and presence (Lower) of 100  $\mu$ M intracellular  $Cd^{2+}$ . (B)  $G$ – $V$  relationships of E399A in 300  $\mu$ M  $Ca^{2+}$  in the absence (open symbols) or presence (filled symbols) of 100  $\mu$ M  $Cd^{2+}$ . Boltzmann fit results (line) are  $z = 0.9e$ ,  $V_h = +9$  mV (control);  $z = 0.7e$ ,  $V_h = +37$  mV (100  $\mu$ M  $Cd^{2+}$ ).

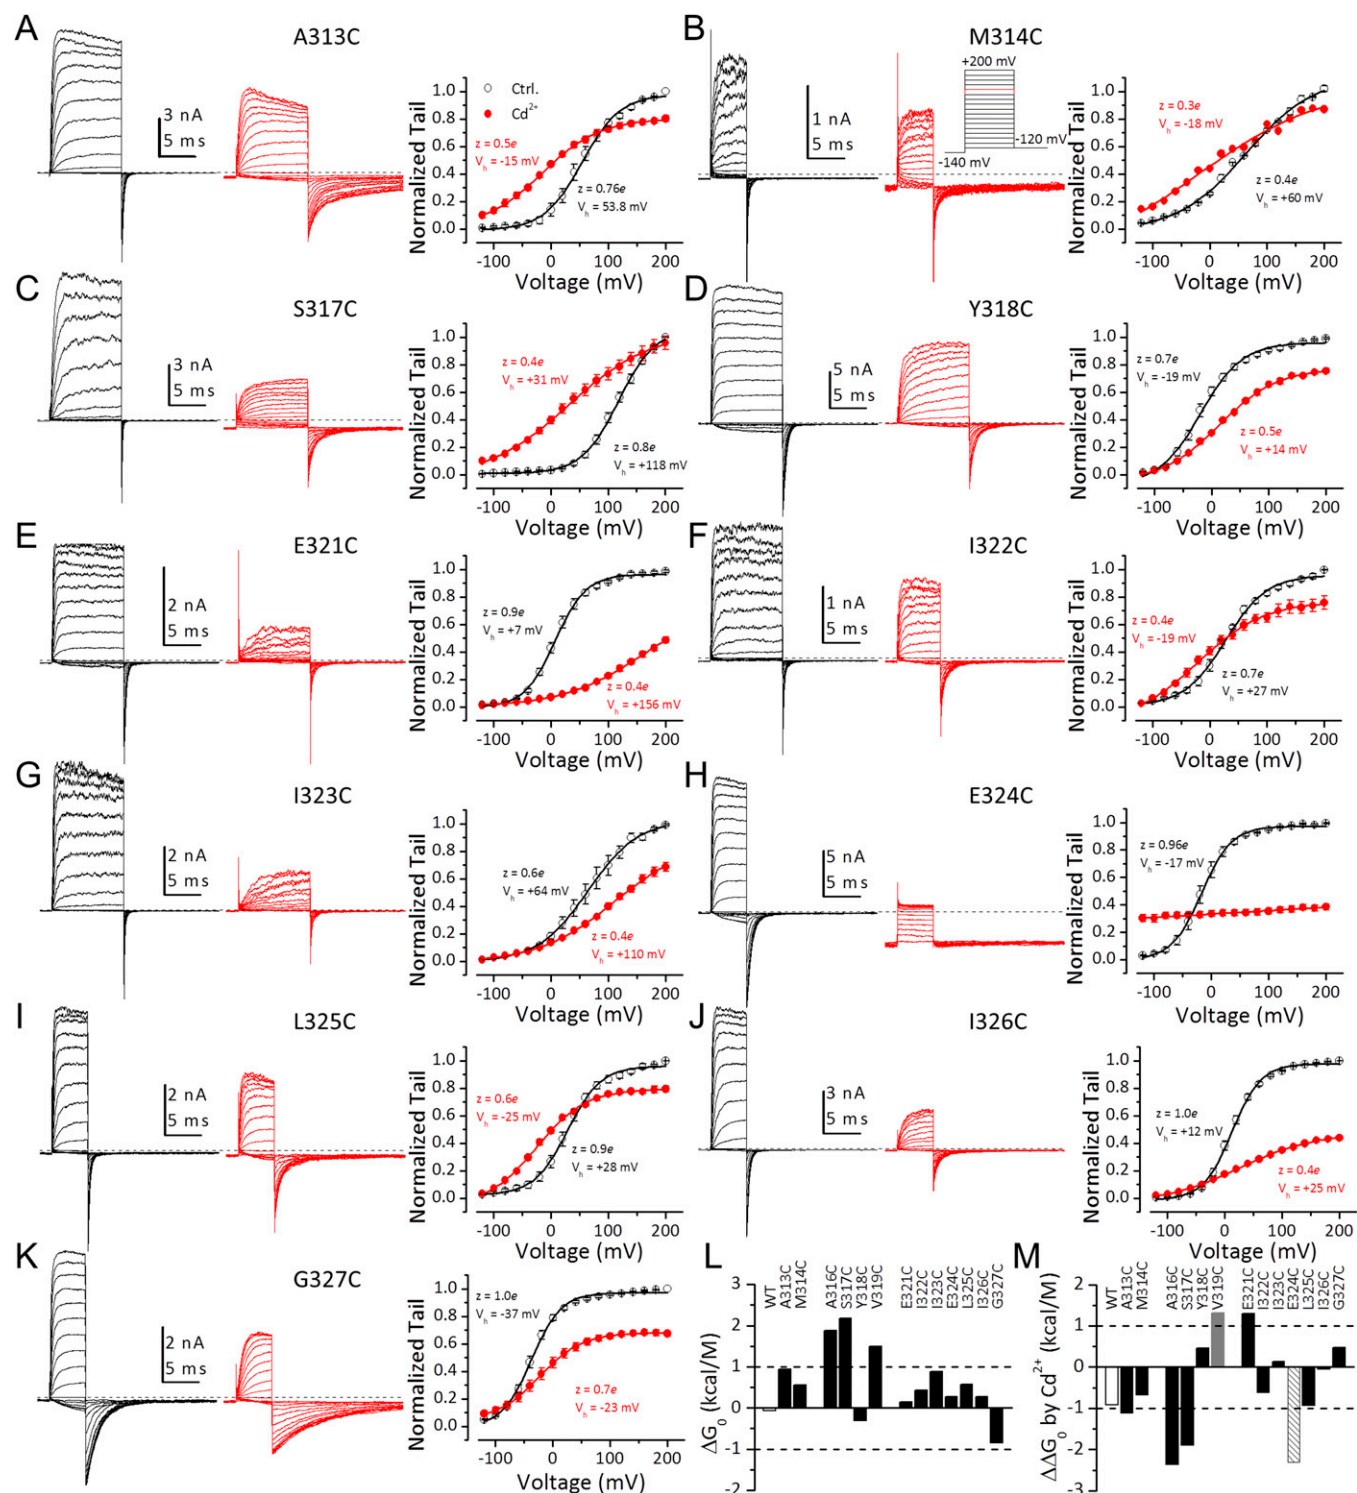

**Fig. S2.** Basic gating properties of BK S6 cysteine mutants. (A–K) Currents of BK S6 cysteine mutants recorded in 300  $\mu\text{M}$   $\text{Ca}^{2+}$  without (black) or with (red) 100  $\mu\text{M}$   $\text{Cd}^{2+}$ . Zero current level is indicated by dotted line. G–V plots are on the right of each pair of sample traces, with Boltzmann fit results (lines) included (black: ctrl; red:  $\text{Cd}^{2+}$ ). (L) Gibbs free energy between closed and open states at 0 mV ( $\Delta G_0$ ) of wild-type (open) and S6 cysteine mutants (filled) in 300  $\mu\text{M}$   $\text{Ca}^{2+}$ .  $\Delta G_0 = 0.2389zFV_h$ , in which  $F$  is the Faraday's constant. Apparent equivalent gating charge  $z$  and half-maximal activation potential  $V_h$  are determined from Boltzmann fit of average G–V. (M) Change of  $\Delta G_0$  ( $\Delta\Delta G_0$ ) of the wild-type (open) and S6 cysteine mutants (filled) in 100 mM  $\text{Cd}^{2+}$ .  $\Delta\Delta G_0 = \Delta G_0^{\text{Cd}} - \Delta G_0^{\text{Ctrl}}$ . The  $z$  and  $V_h$  of V319C (gray) in  $\text{Cd}^{2+}$  was determined from Boltzmann fit of G–V simulated with the Horrigan–Aldrich model, assuming VSD–PGD coupling factor  $D$  decreases from 25 to 6 in 100  $\mu\text{M}$   $\text{Cd}^{2+}$ . The  $V_h$  of E324C (stripe) in 100  $\mu\text{M}$   $\text{Cd}^{2+}$  is more negative than  $-200$  mV (H), and the minimal  $\Delta\Delta G_0$  of E324C was estimated by using  $V_h$  of  $-200$  mV and  $z$  of 0.44 (mean value of  $z$  of all other 12 S6 cysteine mutations in 100  $\mu\text{M}$   $\text{Cd}^{2+}$ ) in 100  $\mu\text{M}$   $\text{Cd}^{2+}$ .

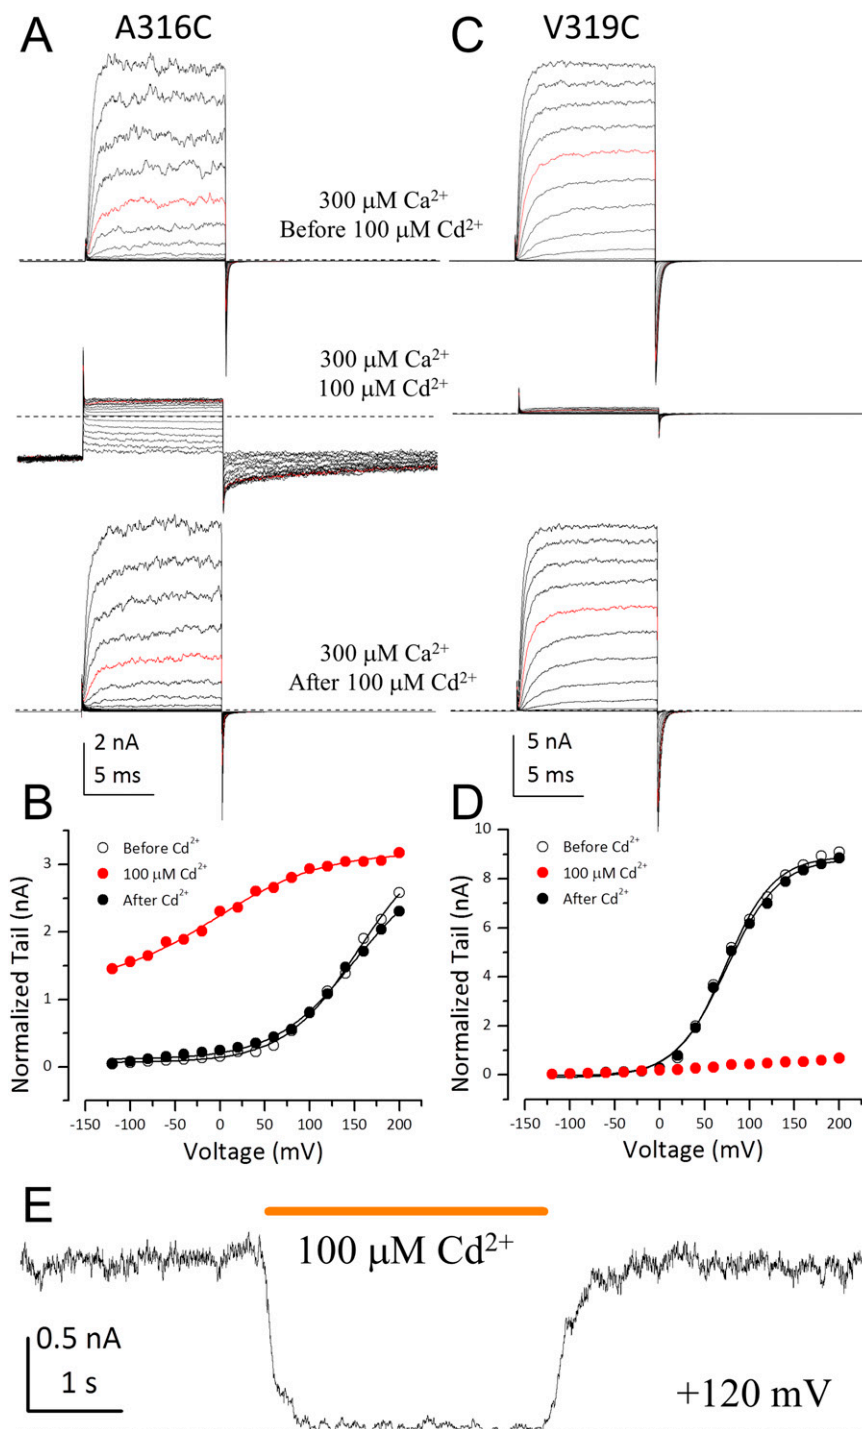

**Fig. S3.**  $\text{Cd}^{2+}$  coordination with A316C or V319C is reversible. (A) Macroscopic currents of A316C recorded in 300  $\mu\text{M}$   $\text{Ca}^{2+}$  before (Top), during (Middle), and after (Bottom) perfusion in 100  $\mu\text{M}$   $\text{Cd}^{2+}$ . (B)  $G$ - $V$  relationships of A316C in 300  $\mu\text{M}$   $\text{Ca}^{2+}$  before (open), during (red filled) and after (black filled) perfusion in 100  $\mu\text{M}$   $\text{Cd}^{2+}$ . Boltzmann fit results (line) are  $z = 0.6e$ ,  $V_h = +153$  mV (before);  $z = 0.42e$ ,  $V_h = -4$  mV (during);  $z = 0.6e$ ,  $V_h = +149$  mV (after). (C) Macroscopic currents of V319C recorded in 300  $\mu\text{M}$   $\text{Ca}^{2+}$  before (Top), during (Middle), and after (Bottom) perfusion in 100  $\mu\text{M}$   $\text{Cd}^{2+}$ . (D)  $G$ - $V$  relationships of V319C in 300  $\mu\text{M}$   $\text{Ca}^{2+}$  before (open), during (red filled), and after (black filled) perfusion in 100  $\mu\text{M}$   $\text{Cd}^{2+}$ . Boltzmann fit results (line) are  $z = 0.9e$ ,  $V_h = +73$  mV (before);  $z = 0.9e$ ,  $V_h = +74$  mV (after). (E) V319C current recorded at +120 mV in 300  $\mu\text{M}$   $\text{Ca}^{2+}$ . Application of 100  $\mu\text{M}$   $\text{Cd}^{2+}$  is indicated by orange bar. Zero-current level is indicated by dotted line.



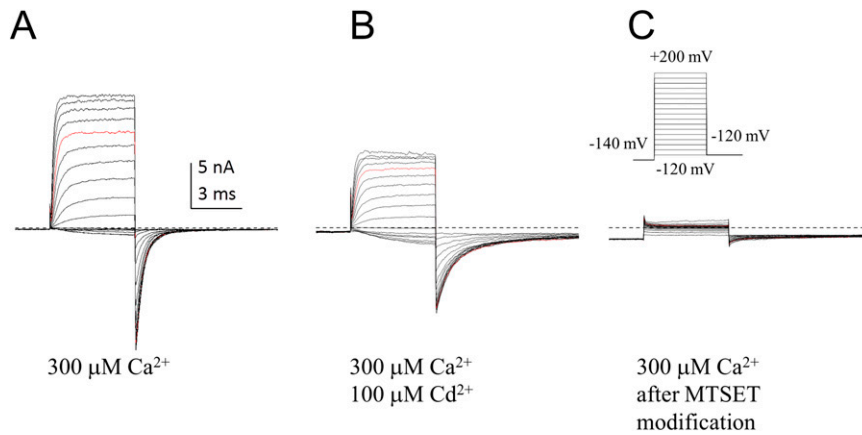

**Fig. S6.** V319C can still be modified by intracellular MTSET in the V319CE321Q construct. (A) Macroscopic V319CE321Q currents recorded in control solution. (B) Currents recorded from the same patch in A in the presence of 100  $\mu\text{M}$   $\text{Cd}^{2+}$ . (C) Currents recorded in control solution after perfusion in 1 mM MTSET at +60 mV for 15 s. Modification of V319C is indicated by the strong inhibition of outward current after perfusion in MTSET.

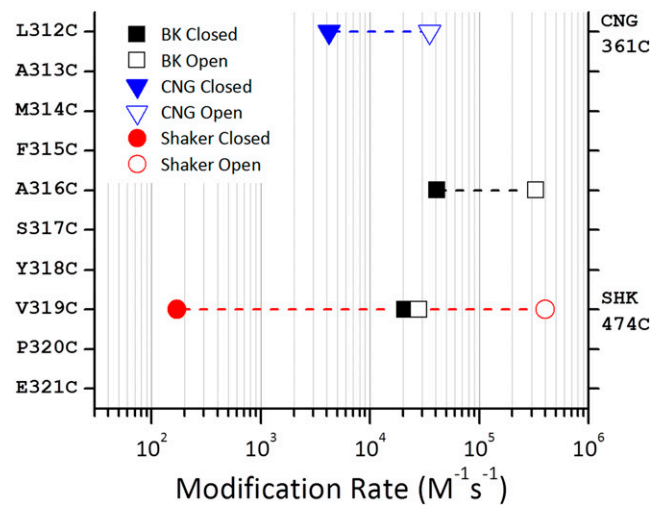

**Fig. S7.** Second-order rate constants of  $\text{Cd}^{2+}$  coordination with BK V319C or A316C in closed (filled square) and open (open square) states plotted on logarithmic scale. Results from CNG (1) (triangle) and Shaker channels (2) (circle) are plotted for comparison.

- Contreras JE, Srikumar D, Holmgren M (2008) Gating at the selectivity filter in cyclic nucleotide-gated channels. *Proc Natl Acad Sci USA* 105(9):3310–3314.
- del Camino D, Yellen G (2001) Tight steric closure at the intracellular activation gate of a voltage-gated K(+) channel. *Neuron* 32(4):649–656.

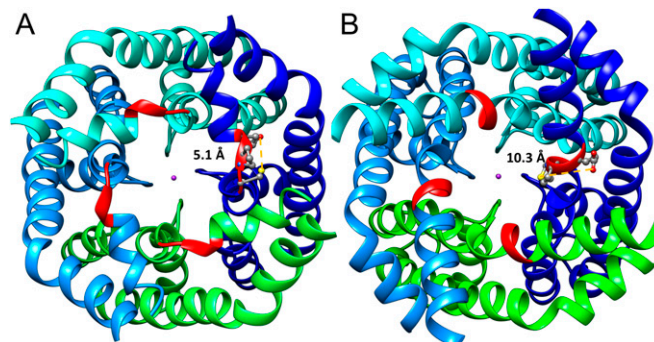

**Fig. S8.** Cartoon of a theoretical BK PGD based considerations given in the text (A) and the Kv PGD from the Kv1.2 crystal structure (PDB ID code 2A79) (B) viewed from their cytosolic entrances. Each subunit is rendered in distinct colors. The CPE triplets are colored in red. The side chains of the triplet in one subunit are rendered as ball and chain with distances between Glu(O $\delta$ ) and Cys(S) marked by orange dotted lines. The purple dots in the center are potassium ions.
